# Supplementary material
Source: HighWire-hosted journal article supplement (https://jnis.bmj.com/content/neurintsurg-2018-014455)
Supplement: inline-supplementary-material-4 [file inline-supplementary-material-4.docx]

Supplementary Table III: Neuroform Atlas® Stents Implanted in the HDE Study

| **Diameter x Length** | | | | | Total  N (%) |
| --- | --- | --- | --- | --- | --- |
| Diameter | Length | | | |
| 15mm  n (%) | 21mm  n (%) | 24mm  n (%) | 30mm  n (%) |
| 3.0 mm |  | 9 (27.3%) | 5 (15.2%) | 3 (9.1%) | 17 (51.5%) |
| 4.0 mm | 2 (6.1%) | 4 (12.1%) | 2 (6.1%) |  | 8 (24.2%) |
| 4.5 mm |  | 2 (6.1%) | 2 (6.1%) | 4 (12.1%) | 8 (24.2%) |

| Total | 2 (6.1%) | 15 (45.5%) | 9 (27.3%) | 7 (21.2) | 33 (100%) |
| --- | --- | --- | --- | --- | --- |
